# Supplementary material for: A series of lanthanide(iii) complexes constructed from Schiff base and β-diketonate ligands
Source: Royal Society of Chemistry journal article supplement (doi:10.1039/c4ce01556h), 2014-01-01
Supplement: c4ce01556h1.pdf [file c4ce01556h1.pdf]

# A series of lanthanide(III) complexes constructed from Schiff base and $\beta$ -diketonate ligands

Ou Sun,<sup>a</sup> Ting Gao, <sup>\*,a,b</sup> Jingwen Sun,<sup>a</sup> Guangming Li,<sup>a</sup> Hongfeng Li,<sup>a</sup> Hui Xu,<sup>a</sup>

Cheng Wang,<sup>a</sup> and Pengfei Yan <sup>\*,a</sup>

<sup>a</sup> Key Laboratory of Functional Inorganic Material Chemistry (MOE), School of Chemistry and Materials Science, Heilongjiang University, No. 74, Xuefu Road, Nangang District, Harbin 150080, People's Republic of China, E-mail: [gaotingmail@sina.cn](mailto:gaotingmail@sina.cn) ; E-mail: [yanpf@vip.sina.com](mailto:yanpf@vip.sina.com)

<sup>b</sup> Key Laboratory of Chemical Engineering Process & Technology for High-efficiency Conversion, College of Heilongjiang Province, No. 74, Xuefu Road, Nangang District, Harbin 150080, People's Republic of China

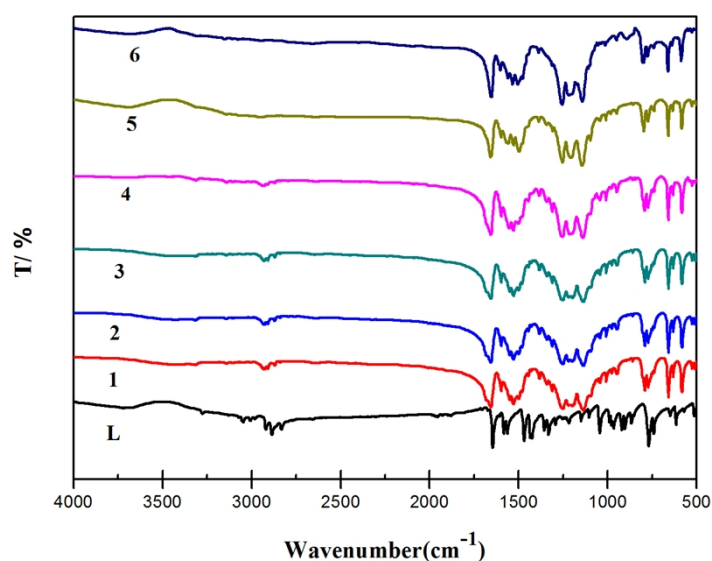

**Fig. S1** Infrared spectra of complexes 1-6

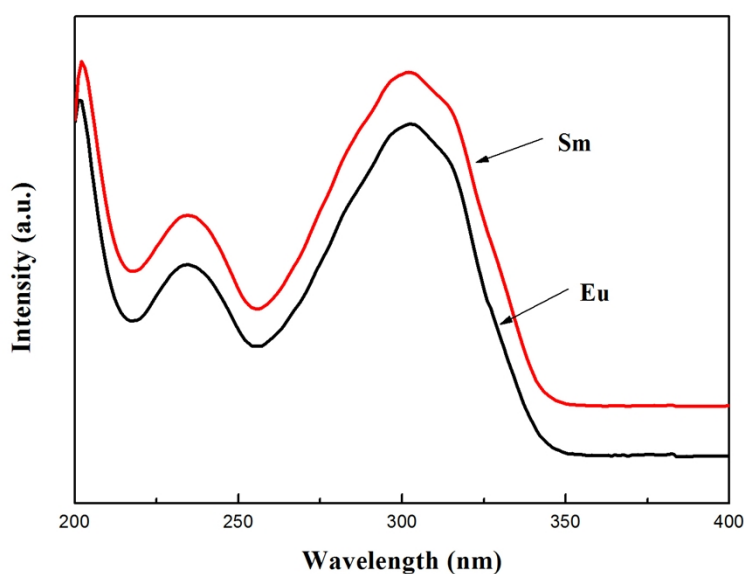

**Fig. S2** UV spectra of complexes 2 and 3

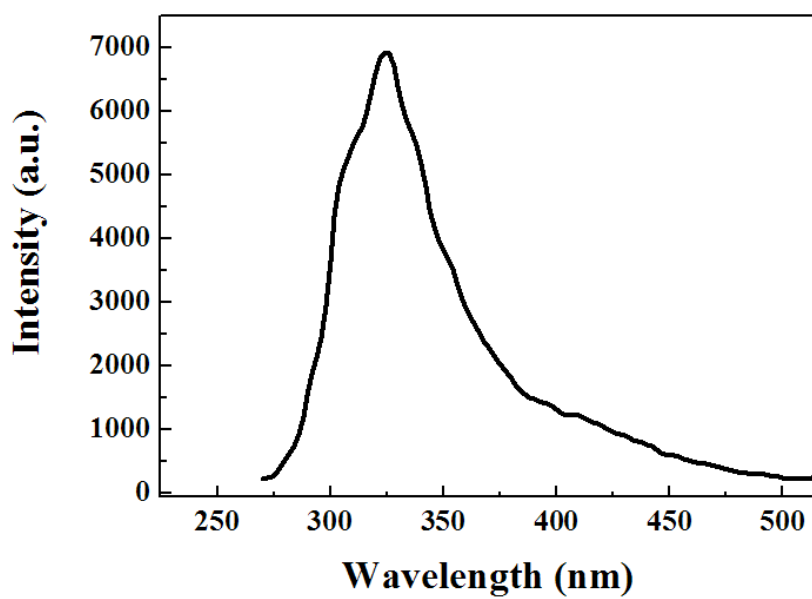

**Fig. S3** luminescence spectrum of the Schiff base ligand L in in MeOH solution at room temperature.

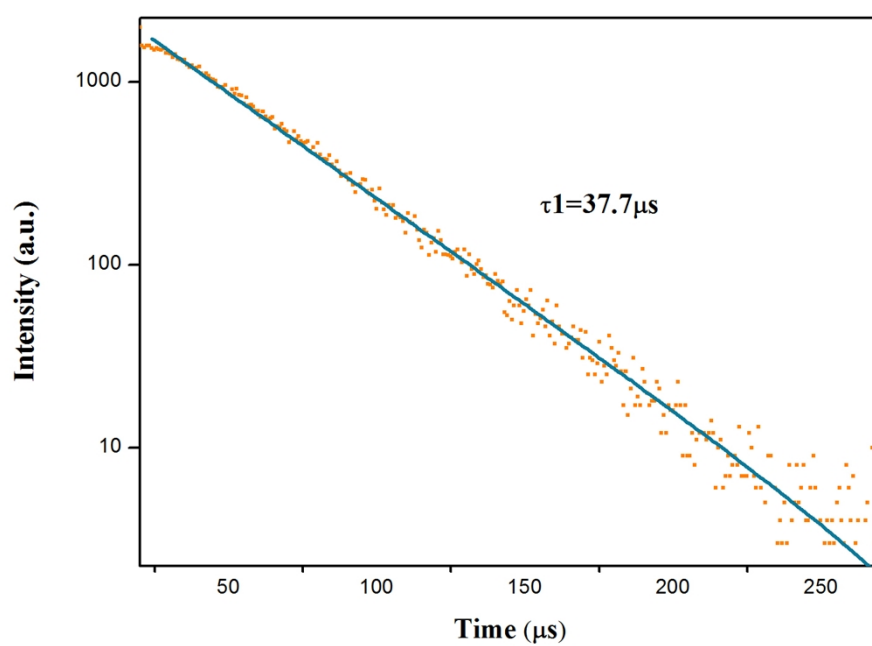

**Fig. S4** Luminescence decay profiles for complex 2 in MeOH solution

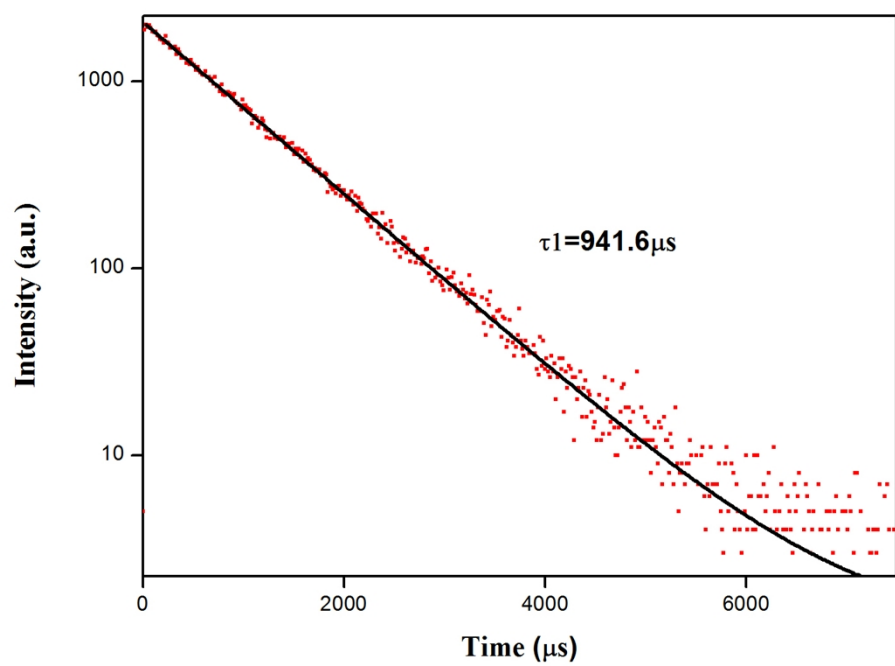

Fig. S5 Luminescence decay profiles for complex 3 in MeOH solution

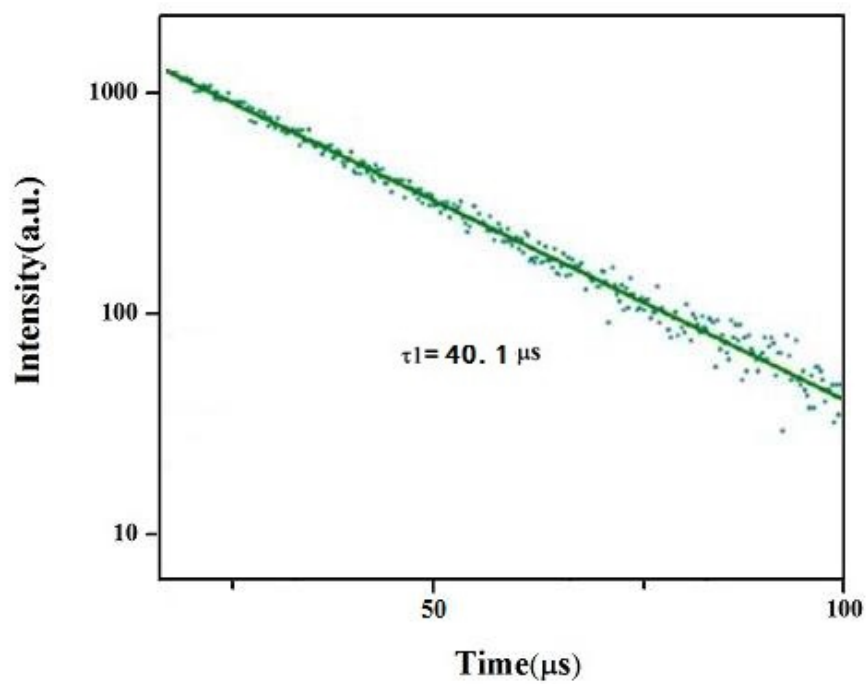

Fig. S6 Luminescence decay profiles for complex 2 in solid state

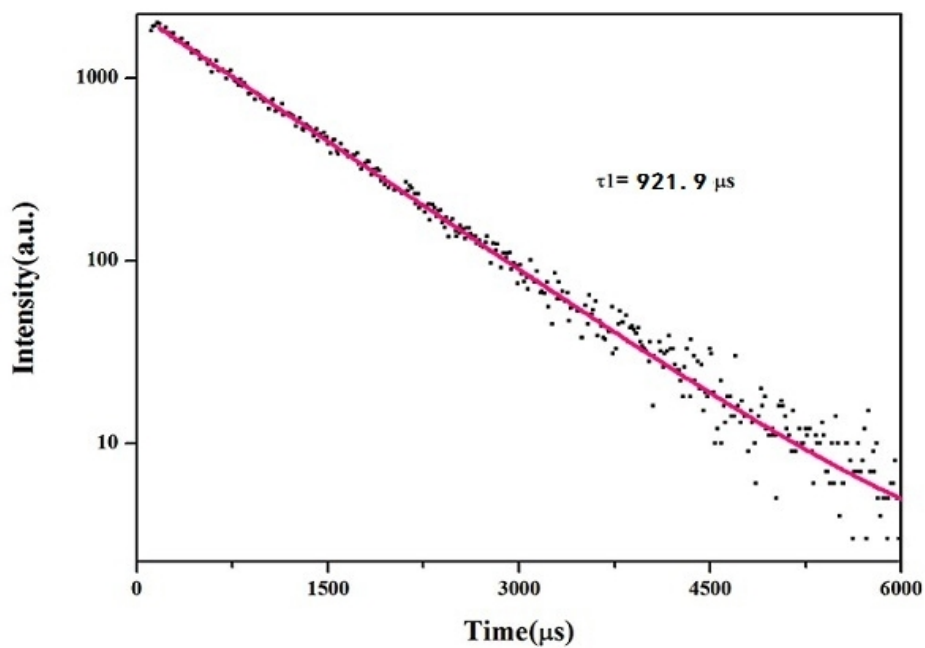

Fig. S7 Luminescence decay profiles for complex 3 in solid state

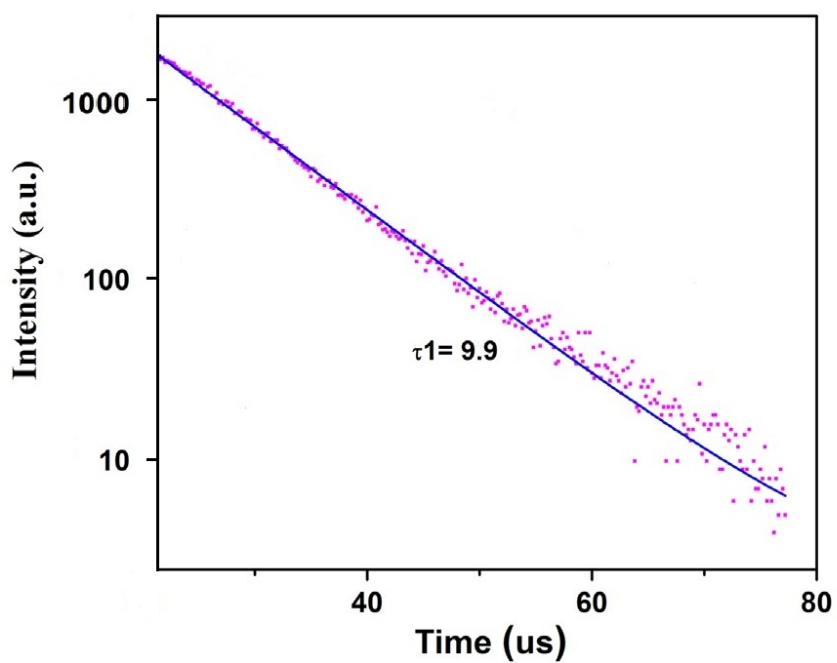

Fig. S8 Luminescence decay profiles for complex 6 in MeOH solution

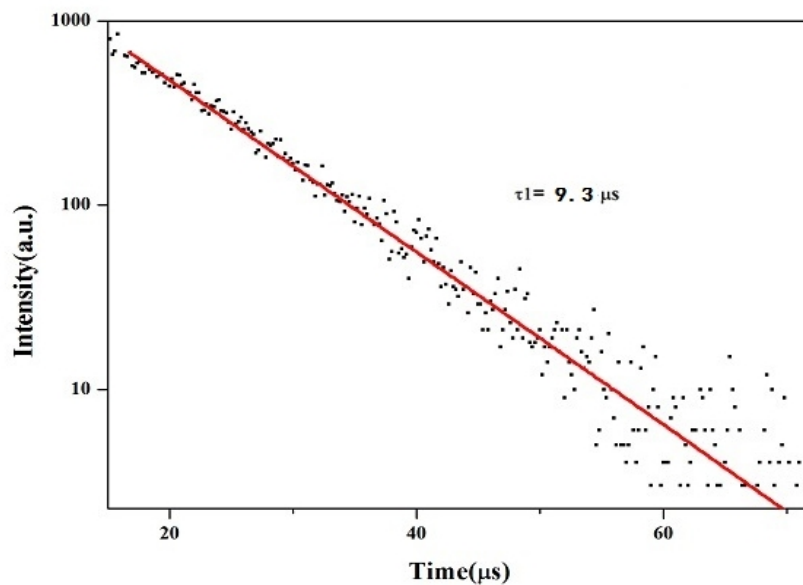

**Fig. S9** Luminescence decay profiles for complex **6** in solid state

**Table S1** Selected bond distances (Å) for **1–3**

|                  |           |            |           |
|------------------|-----------|------------|-----------|
| <b>Complex 1</b> |           |            |           |
| Nd(1)–O(2)       | 2.461(7)  | Nd(1)–O(5) | 2.490(6)  |
| Nd(1)–O(4)       | 2.495(6)  | Nd(1)–O(3) | 2.503(6)  |
| Nd(1)–O(1)       | 2.526(6)  | Nd(1)–O(6) | 2.548(8)  |
| Nd(1)–N(3)       | 2.621(8)  | Nd(1)–N(1) | 2.696(8)  |
| Nd(1)–N(4)       | 2.705(9)  | Nd(1)–N(2) | 2.714(9)  |
| <b>Complex 2</b> |           |            |           |
| Sm(1)–O(4)       | 2.423(7)  | Sm(1)–O(1) | 2.460(6)  |
| Sm(1)–O(6)       | 2.467(6)  | Sm(1)–O(5) | 2.480(7)  |
| Sm(1)–O(3)       | 2.500(6)  | Sm(1)–O(2) | 2.512(7)  |
| Sm(1)–N(2)       | 2.617(8)  | Sm(1)–N(1) | 2.689(8)  |
| Sm(1)–N(3)       | 2.692(8)  | Sm(1)–N(4) | 2.709(8)  |
| <b>Complex 3</b> |           |            |           |
| Eu(1)–O(4)       | 2.395(7)  | Eu(1)–O(6) | 2.436(7)  |
| Eu(1)–O(2)       | 2.461(7)  | Eu(1)–O(3) | 2.472(7)  |
| Eu(1)–O(1)       | 2.473(7)  | Eu(1)–O(5) | 2.519(8)  |
| Eu(1)–N(2)       | 2.616(9)  | Eu(1)–N(3) | 2.670(10) |
| Eu(1)–N(4)       | 2.698(10) | Eu(1)–N(1) | 2.708(9)  |

**Table S2 Selected bond distances (Å) for 4**

|             |           |             |           |
|-------------|-----------|-------------|-----------|
| Gd(1)–O(6)  | 2.345(15) | Gd(1)–O(10) | 2.359(17) |
| Gd(1)–O(7)  | 2.366(16) | Gd(1)–O(9)  | 2.404(18) |
| Gd(1)–O(11) | 2.456(15) | Gd(1)–O(8)  | 2.503(14) |
| Gd(1)–O(12) | 2.520(17) | Gd(1)–N(1)  | 2.626(18) |
| Gd(1)–N(2)  | 2.658(15) | Gd(2)–O(14) | 2.343(14) |
| Gd(2)–O(20) | 2.380(16) | Gd(2)–O(15) | 2.395(17) |
| Gd(2)–O(17) | 2.399(19) | Gd(2)–O(18) | 2.455(15) |
| Gd(2)–O(19) | 2.466(17) | Gd(2)–O(16) | 2.497(16) |
| Gd(2)–N(4)  | 2.617(19) | Gd(2)–N(3)  | 2.651(15) |
| Gd(3)–O(5)  | 2.353(14) | Gd(3)–O(2)  | 2.390(17) |
| Gd(3)–O(3)  | 2.394(16) | Gd(3)–O(1)  | 2.419(16) |
| Gd(3)–O(4)  | 2.467(15) | Gd(3)–N(7)  | 2.53(2)   |
| Gd(3)–N(6)  | 2.572(19) | Gd(3)–N(5)  | 2.635(19) |
| Gd(3)–N(8)  | 2.650(19) | Gd(4)–O(13) | 2.322(15) |
| Gd(4)–O(22) | 2.395(16) | Gd(4)–O(24) | 2.40(2)   |
| Gd(4)–O(23) | 2.416(18) | Gd(4)–O(21) | 2.448(18) |
| Gd(4)–N(11) | 2.54(2)   | Gd(4)–N(10) | 2.58(2)   |
| Gd(4)–N(9)  | 2.60(2)   | Gd(4)–N(12) | 2.68(2)   |

**Table S3 Selected bond distances (Å) for 5**

|             |          |             |          |
|-------------|----------|-------------|----------|
| Dy(1)–O(17) | 2.285(5) | Dy(1)–O(8)  | 2.384(6) |
| Dy(1)–O(5)  | 2.399(5) | Dy(1)–O(7)  | 2.400(6) |
| Dy(1)–O(6)  | 2.413(5) | Dy(1)–N(3)  | 2.501(7) |
| Dy(1)–N(4)  | 2.545(7) | Dy(1)–N(1)  | 2.586(6) |
| Dy(1)–N(2)  | 2.612(7) | Dy(2)–O(13) | 2.267(5) |
| Dy(2)–O(4)  | 2.369(5) | Dy(2)–O(2)  | 2.388(5) |
| Dy(2)–O(1)  | 2.399(5) | Dy(2)–O(3)  | 2.419(5) |
| Dy(2)–N(8)  | 2.506(7) | Dy(2)–N(7)  | 2.571(7) |
| Dy(2)–N(6)  | 2.574(6) | Dy(2)–N(5)  | 2.621(8) |
| Dy(3)–O(32) | 2.311(6) | Dy(3)–O(15) | 2.337(6) |
| Dy(3)–O(16) | 2.339(6) | Dy(3)–O(9)  | 2.349(7) |
| Dy(3)–O(14) | 2.350(6) | Dy(3)–O(12) | 2.360(7) |
| Dy(3)–O(11) | 2.361(6) | Dy(3)–O(33) | 2.415(7) |

**Table S4 Selected bond distances (Å) for 6**

|             |          |             |          |
|-------------|----------|-------------|----------|
| Yb(1)–O(3a) | 2.290(5) | Yb(1)–O(3)  | 2.290(5) |
| Yb(1)–O(2)  | 2.311(6) | Yb(1)–O(2a) | 2.311(6) |
| Yb(1)–O(1a) | 2.324(6) | Yb(1a)–O(1) | 2.324(6) |
| Yb(1)–O(4)  | 2.349(6) | Yb(1)–O(4a) | 2.349(6) |
| Yb(2)–O(5)  | 2.272(7) | Yb(2)–O(5a) | 2.272(7) |
| Yb(2)–O(6a) | 2.286(6) | Yb(2)–O(6)  | 2.286(6) |
| Yb(2)–N(2)  | 2.401(7) | Yb(2)–N(2a) | 2.401(7) |
| Yb(2)–N(1a) | 2.459(7) | Yb(2)–N(1)  | 2.459(7) |
